# Supplementary material
Source: ML conference proceedings conference paper supplement (https://proceedings.mlr.press/v130/mardaoui21a.html)
Supplement: Supplementary file 1 [file mardaoui21a-supp.pdf]

---

## Supplementary material for the paper: “An Analysis of LIME for Text Data”

---

### Organization of the supplementary material

In this supplementary material, we collect the proofs of all our theoretical results and additional experiments. We study the covariance matrix in Section 1 and the responses in Section 2. The proof of our main results can be found in Section 3. Combinatorial results needed for the approximation formulas obtained in the linear case are collected in Section 4, while other technical results can be found in Section 5. Finally, we present some additional experiments in Section 6.

**Notation.** First, let us quickly recall our notation. We consider  $x, z, \pi$  the generic random variables associated to the sampling of new examples by LIME. To put it plainly, the new examples  $x_1, \dots, x_n$  are i.i.d. samples from the random variable  $x$ . Also remember that we denote by  $S \subseteq \{1, \dots, d\}$  the random subset of indices removed by LIME when creating new samples for a text with  $d$  distinct words. For any finite set  $R$ , we write  $\#R$  the cardinality of  $R$ . Recall that we denote by  $S$  the random set of indices deleted in the sampling. We write  $\mathbb{E}_s$  the expectation conditionally to  $\#S = s$ . Since we consider vectors belonging to  $\mathbb{R}^{d+1}$  with the zero-th coordinate corresponding to an intercept, we will often start the numbering at 0 instead of 1. For any matrix  $M$ , we set  $\|M\|_F$  the Frobenius norm of  $M$  and  $\|M\|_{\text{op}}$  the operator norm of  $M$ .

### 1 The study of $\Sigma$

We begin by the study of the covariance matrix. We show in Section 1.1 how to compute  $\Sigma$ . We will see how the  $\alpha$  coefficients defined in the main paper appear. In Section 1.2, we show that it is possible to invert  $\Sigma$  in closed-form: it can be written in function of  $c_d$  and the  $\sigma$  coefficients. We show how  $\hat{\Sigma}_n$  concentrates around  $\Sigma$  in Section 1.3. Finally, Section 1.4 is dedicated to the control of  $\|\Sigma^{-1}\|_{\text{op}}$ .

#### 1.1 Computation of $\Sigma$

In this section, we derived a closed-form expression for  $\Sigma := \mathbb{E}[\hat{\Sigma}_n]$  as a function of  $d$  and  $\nu$ . Recall that we defined  $\hat{\Sigma} = \frac{1}{n} Z^\top W Z$ . By definition of  $Z$  and  $W$ , we have

$$\hat{\Sigma} = \begin{pmatrix} \frac{1}{n} \sum_{i=1}^n \pi_i & \frac{1}{n} \sum_{i=1}^n \pi_i z_{i,1} & \cdots & \frac{1}{n} \sum_{i=1}^n \pi_i z_{i,d} \\ \frac{1}{n} \sum_{i=1}^n \pi_i z_{i,1} & \frac{1}{n} \sum_{i=1}^n \pi_i z_{i,1}^2 & \cdots & \frac{1}{n} \sum_{i=1}^n \pi_i z_{i,1} z_{i,d} \\ \vdots & \vdots & \ddots & \vdots \\ \frac{1}{n} \sum_{i=1}^n \pi_i z_{i,d} & \frac{1}{n} \sum_{i=1}^n \pi_i z_{i,1} z_{i,d} & \cdots & \frac{1}{n} \sum_{i=1}^n \pi_i z_{i,d}^2 \end{pmatrix} \in \mathbb{R}^{(d+1) \times (d+1)}.$$

Taking the expectation in the last display with respect to the sampling of new examples yields

$$\Sigma = \begin{pmatrix} \mathbb{E}[\pi] & \mathbb{E}[\pi z_1] & \cdots & \mathbb{E}[\pi z_d] \\ \mathbb{E}[\pi z_1] & \mathbb{E}[\pi z_1^2] & \cdots & \mathbb{E}[\pi z_1 z_d] \\ \vdots & \vdots & \ddots & \vdots \\ \mathbb{E}[\pi z_d] & \mathbb{E}[\pi z_1 z_d] & \cdots & \mathbb{E}[\pi z_d^2] \end{pmatrix} \in \mathbb{R}^{(d+1) \times (d+1)}. \quad (13)$$

An important remark is that  $\mathbb{E}[\pi z_j]$  does not depend on  $j$ . Indeed, there is no privileged index in the sampling of  $S$  (the subset of removed indices). Thus we only have to look into  $\mathbb{E}[\pi z_1]$  (say). For the same reason,  $\mathbb{E}[\pi z_j z_k]$  does not depend on the 2-uple  $(j, k)$ , and we can limit our investigations to  $\mathbb{E}[\pi z_1 z_2]$ . This is the reason why we

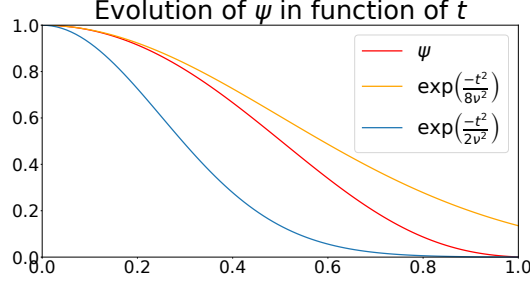

Figure 8: The function  $\psi$  defined by Eq. (15) with bandwidth parameter  $\nu = 0.25$ . In orange (resp. blue), one can see the upper (resp. lower) bound given by Eq. (16).

defined  $\alpha_0 = \mathbb{E}[\pi]$  and, for any  $1 \leq p \leq d$ ,

$$\alpha_p = \mathbb{E}[\pi \cdot z_1 \cdots z_p] \quad (14)$$

in the main paper. We recognize the definition of the  $\alpha_p$ s in Eq. (13) and we write

$$\Sigma_{j,k} = \begin{cases} \alpha_0 & \text{if } j = k = 0, \\ \alpha_1 & \text{if } j = 0 \text{ and } k > 0 \text{ or } j > 0 \text{ and } k = 0 \text{ or } j = k > 0, \\ \alpha_2 & \text{otherwise.} \end{cases}$$

As promised, we can be more explicit regarding the  $\alpha$  coefficients. Recall that we defined the mapping

$$\begin{aligned} \psi: [0, 1] &\longrightarrow \mathbb{R} \\ t &\longmapsto \exp\left(-(1 - \sqrt{1-t})^2/(2\nu^2)\right). \end{aligned} \quad (15)$$

It is a decreasing mapping (see Figure 8). With this notation in hand, we have the following expression for the  $\alpha$  coefficients (this is Proposition 1 in the paper):

**Proposition 5 (Computation of the  $\alpha$  coefficients).** *For any  $d \geq 1$ ,  $\nu > 0$ , and  $p \geq 0$ , it holds that*

$$\alpha_p = \frac{1}{d} \sum_{s=1}^d \prod_{k=0}^{p-1} \frac{d-s-k}{d-k} \psi\left(\frac{s}{d}\right).$$

In particular, the first three  $\alpha$  coefficients can be written

$$\alpha_0 = \frac{1}{d} \sum_{s=1}^d \psi\left(\frac{s}{d}\right), \quad \alpha_1 = \frac{1}{d} \sum_{s=1}^d \left(1 - \frac{s}{d}\right) \psi\left(\frac{s}{d}\right), \quad \text{and} \quad \alpha_2 = \frac{1}{d} \sum_{s=1}^d \left(1 - \frac{s}{d}\right) \left(1 - \frac{s}{d-1}\right) \psi\left(\frac{s}{d}\right).$$

*Proof.* The idea of the proof is to use the law of total expectation with respect to the collection of events  $\{\#S = s\}$  for  $s \in \{1, \dots, d\}$ . Since  $\mathbb{P}(\#S = s) = \frac{1}{d}$  for any  $1 \leq s \leq d$ , all that is left to compute is the expectation of  $\pi z_1 \cdots z_p$  conditionally to  $\#S = s$ . According to the remark in Section 2.3 of the main paper,  $\pi = \psi(s/d)$  conditionally to  $\{\#S = s\}$ . We can conclude since, according to Lemma 4,

$$\mathbb{P}_s(w_1 \in x, \dots, w_p \in x) = \frac{(d-s)(d-s-1) \cdots (d-s-p+1)}{d(d-1) \cdots (d-p+1)}.$$

□

It is important to notice that, when  $\nu \rightarrow +\infty$ ,  $\psi(t) \rightarrow 0$  for any  $t \in (0, 1]$ . As a consequence, in the large bandwidth regime, the  $\psi(s/d)$  weights are arbitrarily close to one. We demonstrate this effect in Figure 9. In this situation, the  $\alpha$  coefficients take a simpler form.

**Corollary 1 (Large bandwidth approximation of  $\alpha$  coefficients).** *For any  $0 \leq p \leq d$ , it holds that*

$$\lim_{\nu \rightarrow +\infty} \alpha_p = \frac{d-p}{(p+1)d}.$$

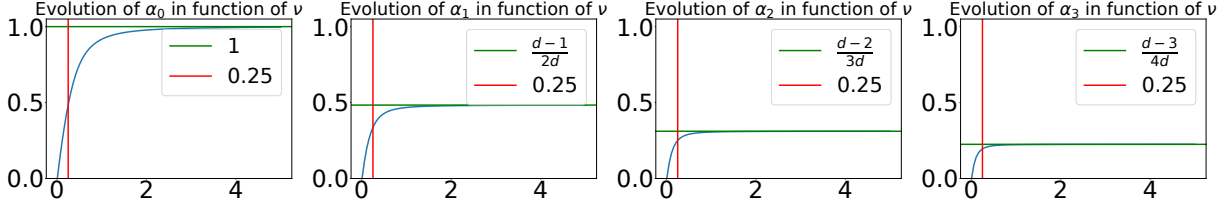

Figure 9: Behavior of the first  $\alpha$  coefficients with respect to the bandwidth parameter  $\nu$ . The red vertical lines mark the default bandwidth choice ( $\nu = 0.25$ ). The green horizontal line denotes the limits for large  $d$  given by Corollary 1.

We report these approximate values in Figure 9. In particular, when both  $\nu$  and  $d$  are large, we can see that  $\alpha_p \approx 1/(p+1)$ . Thus  $\alpha_0 \approx 1$ ,  $\alpha_1 \approx \frac{1}{2}$ , and  $\alpha_2 \approx \frac{1}{3}$ .

*Proof.* When  $\nu \rightarrow +\infty$ , we have  $\psi(s/d) \rightarrow 1$  and we can conclude directly by using Lemma 5.  $\square$

Notice that we can be slightly more precise than Corollary 1. Indeed,  $\psi$  is decreasing on  $[0, 1]$ , thus for any  $t \in [0, 1]$ ,  $\exp(-1/(2\nu^2)) \leq \psi(t) \leq 1$ . Therefore we can present some efficient bounds for the  $\alpha$  coefficients when  $\nu$  is large.

**Corollary 2 (Bounds on the  $\alpha$  coefficients).** *For any  $0 \leq p \leq d$ , it holds that*

$$\frac{d-p}{(p+1)d} e^{-\frac{1}{2\nu^2}} \leq \alpha_p \leq \frac{d-p}{(p+1)d}.$$

One can further show that, for any  $0 \leq t \leq 1$ ,

$$\exp\left(\frac{-t^2}{2\nu^2}\right) \leq \psi(t) \leq \exp\left(\frac{-t^2}{8\nu^2}\right). \quad (16)$$

Using Eq. (16) together with the series-integral comparison theorem would yield very accurate bounds for the  $\alpha$  coefficients and related quantities, but we will not follow that road.

## 1.2 Computation of $\Sigma^{-1}$

In this section, we present a closed-form formula for the matrix inverse of  $\Sigma$  as a function of  $d$  and  $\nu$ .

**Proposition 6 (Computation of  $\Sigma^{-1}$ ).** *For any  $d \geq 1$  and  $\nu > 0$ , recall that we defined*

$$c_d = (d-1)\alpha_0\alpha_2 - d\alpha_1^2 + \alpha_0\alpha_1.$$

*Assume that  $c_d \neq 0$  and  $\alpha_1 \neq \alpha_2$ . Define  $\sigma_0 := (d-1)\alpha_2 + \alpha_1$  and recall that we set*

$$\begin{cases} \sigma_1 &= -\alpha_1, \\ \sigma_2 &= \frac{(d-2)\alpha_0\alpha_2 - (d-1)\alpha_1^2 + \alpha_0\alpha_1}{\alpha_1 - \alpha_2}, \\ \sigma_3 &= \frac{\alpha_1^2 - \alpha_0\alpha_2}{\alpha_1 - \alpha_2}. \end{cases}$$

*Then it holds that*

$$\Sigma^{-1} = \frac{1}{c_d} \begin{pmatrix} \sigma_0 & \sigma_1 & \sigma_1 & \cdots & \sigma_1 \\ \sigma_1 & \sigma_2 & \sigma_3 & \cdots & \sigma_3 \\ \sigma_1 & \sigma_3 & \sigma_2 & \ddots & \vdots \\ \vdots & \vdots & \ddots & \ddots & \sigma_3 \\ \sigma_1 & \sigma_3 & \cdots & \sigma_3 & \sigma_2 \end{pmatrix} \in \mathbb{R}^{(d+1) \times (d+1)}. \quad (17)$$

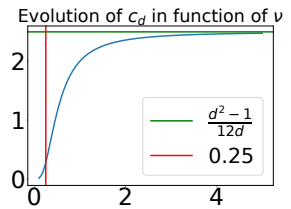

Figure 10: Evolution of the normalization constant  $c_d$  as a function of the bandwidth for  $d = 30$ . In red, the default bandwidth  $\nu = 0.25$ , in green the limit for large bandwidth given by Corollary 3.

We display the evolution of the  $\sigma_i/c_d$  coefficients with respect to  $\nu$  in Figure 11.

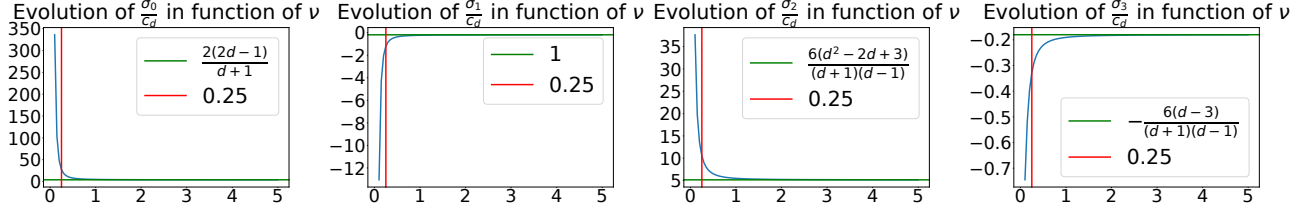

Figure 11: Evolution of  $\sigma_i/c_d$  as a function of  $\nu$  for  $1 \leq i \leq 4$  for  $d = 30$ . In red the default value of the bandwidth. In green the limits given by Corollary 3. We can see that the  $\sigma$  coefficients are close to these limit values for the default bandwidth.

*Proof.* From Eq. (13), we can see that  $\Sigma$  is a block matrix. The result follows from the block matrix inversion formula and one can check directly that  $\Sigma \cdot \Sigma^{-1} = I_{d+1}$ .  $\square$

Our next result shows that the assumptions of Proposition 6 are satisfied:  $\alpha_1 - \alpha_2$  and  $c_d$  are positive quantities. In fact, we prove a slightly stronger statement which will be necessary to control the operator norm of  $\Sigma^{-1}$ .

**Proposition 7** ( $\Sigma$  is invertible). *For any  $d \geq 2$ ,*

$$\alpha_1 - \alpha_2 \geq \frac{e^{-\frac{1}{2\nu^2}}}{6} > 0, \quad \text{and} \quad c_d \geq \frac{e^{-\frac{2}{\nu^2}}}{40} > 0.$$

*Proof.* By definition of the  $\alpha$  coefficients (Eq. (14)), we have

$$\alpha_1 - \alpha_2 = \frac{1}{d} \sum_{s=1}^d \left(1 - \frac{s}{d}\right) \frac{s}{d-1} \psi\left(\frac{s}{d}\right).$$

Since  $e^{-\frac{1}{2\nu^2}} \leq \psi(t) \leq 1$  for any  $t \in [0, 1]$ , we have

$$e^{-\frac{1}{2\nu^2}} \cdot \frac{1}{d} \sum_{s=1}^d \left(1 - \frac{s}{d}\right) \frac{s}{d-1} = \frac{d+1}{6d} \cdot e^{-\frac{1}{2\nu^2}} \leq \alpha_1 - \alpha_2 \leq \frac{d+1}{6d}. \quad (18)$$

The right-hand side of Eq. (18) yields the promised bound. Note that the same reasoning gives

$$\frac{d+1}{2d} \cdot e^{-\frac{1}{2\nu^2}} \leq \alpha_0 - \alpha_1 \leq \frac{d+1}{2d}. \quad (19)$$

Let us now find a lower bound for  $c_d$ . We first start by noticing that

$$\begin{aligned} c_d &= d\alpha_1(\alpha_0 - \alpha_1) - (d-1)\alpha_0(\alpha_1 - \alpha_2) \\ &= \sum_{s=1}^d \left(1 - \frac{s}{d}\right) \psi\left(\frac{s}{d}\right) \cdot \frac{1}{d} \sum_{s=1}^d \frac{s}{d} \psi\left(\frac{s}{d}\right) - \sum_{s=1}^d \psi\left(\frac{s}{d}\right) \cdot \frac{1}{d} \sum_{s=1}^d \left(1 - \frac{s}{d}\right) \psi\left(\frac{s}{d}\right) \\ c_d &= \frac{1}{d} \left[ \sum_{s=1}^d \psi\left(\frac{s}{d}\right) \cdot \sum_{s=1}^d \frac{s^2}{d^2} \psi\left(\frac{s}{d}\right) - \left( \sum_{s=1}^d \frac{s}{d} \psi\left(\frac{s}{d}\right) \right)^2 \right]. \end{aligned} \quad (20)$$

Therefore, by Cauchy-Schwarz inequality,  $c_d \geq 0$ . In fact,  $c_d > 0$  since the equality case in Cauchy-Schwarz is attained for proportional summands, which is not the case here.

However, we need to improve this result if we want to control  $\|\Sigma^{-1}\|_{\text{op}}$  more precisely. To this extent, we use a refinement of Cauchy-Schwarz inequality obtained by Filipovski (2019). Let us set, for any  $1 \leq s \leq d$ ,

$$a_s := \sqrt{\psi\left(\frac{s}{d}\right)}, \quad b_s := \frac{s}{d} \sqrt{\psi\left(\frac{s}{d}\right)}, \quad A := \sqrt{\sum_{s=1}^d a_s^2}, \quad \text{and} \quad B := \sqrt{\sum_{s=1}^d b_s^2}.$$

With these notation,

$$c_d = \frac{1}{d} \left[ A^2 B^2 - \left( \sum_{s=1}^d a_s b_s \right)^2 \right],$$

and Cauchy-Schwarz yields  $A^2 B^2 \geq \left( \sum_{s=1}^d a_s b_s \right)^2$ . Theorem 2.1 in Filipovski (2019) is a stronger result, namely

$$AB \geq \sum_{s=1}^d a_s b_s + \frac{1}{4} \sum_{s=1}^d \frac{(a_s^2 B^2 - b_s^2 A^2)^2}{a_s^4 B^4 + b_s^4 A^4} a_s b_s. \quad (21)$$

Let us focus on this last term. Since all the terms are non-negative, we can lower bound by the term of order  $d$ , that is,

$$\frac{1}{4} \sum_{s=1}^d \frac{(a_s^2 B^2 - b_s^2 A^2)^2}{a_s^4 B^4 + b_s^4 A^4} a_s b_s \geq \frac{1}{4} \frac{(b_d^2 A^2 - a_d^2 B^2)^2}{b_d^4 A^4 + a_d^4 B^4} a_d b_d = \frac{1}{4} \frac{(A^2 - B^2)^2}{A^4 + B^4} \psi(1), \quad (22)$$

since  $a_d = b_d = \sqrt{\psi(1)}$ . On one side, we notice that

$$\begin{aligned} A^2 - B^2 &= \sum_{s=1}^d \left( 1 - \frac{s^2}{d^2} \right) \psi \left( \frac{s}{d} \right) \\ &\geq \exp \left( \frac{-1}{2\nu^2} \right) \cdot \sum_{s=1}^d \left( 1 - \frac{s^2}{d^2} \right) \quad (\text{for any } t \in [0, 1], \psi(t) \geq e^{-1/(2\nu^2)}) \\ &= \exp \left( \frac{-1}{2\nu^2} \right) \cdot \frac{1}{6} \left( 4d - \frac{1}{d} - 3 \right) \\ A^2 - B^2 &\geq \frac{3d \cdot \exp \left( \frac{-1}{2\nu^2} \right)}{8}, \end{aligned}$$

where we used  $d \geq 2$  in the last display. We deduce that  $(A^2 - B^2)^2 \geq 9d^2 e^{\frac{-1}{2\nu^2}} / 64$ . On the other side, it is clear that  $A^2 \leq d$ , and

$$B^2 \leq \sum_{s=1}^d \frac{s^2}{d^2} = \frac{(d+1)(2d+1)}{6d}.$$

For any  $d \geq 2$ , we have  $B^2 \leq 5d/8$ , and we deduce that  $A^4 + B^4 \leq \frac{89}{64}d^2$ . Therefore,

$$\frac{(A^2 - B^2)^2}{A^4 + B^4} \geq \frac{9e^{\frac{-1}{2\nu^2}}}{89}.$$

Coming back to Eq. (22), we proved that

$$\frac{1}{4} \sum_{s=1}^d \frac{(a_s^2 B^2 - b_s^2 A^2)^2}{a_s^4 B^4 + b_s^4 A^4} a_s b_s \geq \frac{9e^{\frac{-3}{2\nu^2}}}{356}.$$

Plugging into Eq. (21) and taking the square, we deduce that

$$A^2 B^2 \geq \left( \sum_{s=1}^d a_s b_s \right)^2 + 2 \cdot \sum_{s=1}^d a_s b_s \cdot \frac{9e^{\frac{-3}{2\nu^2}}}{356} + \frac{81e^{\frac{-3}{2\nu^2}}}{126736}.$$

But  $\sum a_s b_s \geq de^{\frac{-1}{2\nu^2}}/2$ , therefore, ignoring the last term, we have

$$A^2 B^2 - \left( \sum_{s=1}^d a_s b_s \right)^2 \geq \frac{9de^{\frac{-2}{2\nu^2}}}{356}.$$

We conclude by noticing that  $356/9 \leq 40$ . □

**Remark 1.** We suspect that the correct lower bound for  $c_d$  is actually of order  $d$ , but we did not manage to prove it. Careful inspection of the proof shows that this  $d$  factor is lost when considering only the last term of the summation in Eq. (21). It is however challenging to control the remaining terms, since  $B^2$  is roughly half of  $A^2$  and  $\frac{s^2}{d^2}B^2 - A^2$  is close to 0 for some values of  $s$ .

We conclude this section by giving an approximation of  $\Sigma^{-1}$  for large bandwidth. This approximation will be particularly useful in Section 3.1.

**Corollary 3 (Large bandwidth approximation of  $\Sigma^{-1}$ ).** *For any  $d \geq 2$ , when  $\nu \rightarrow +\infty$ , we have*

$$c_d \longrightarrow \frac{d^2 - 1}{12d},$$

and, as a consequence,

$$\begin{cases} \frac{\sigma_0}{c_d} & \rightarrow \frac{2(2d-1)}{d+1} = 4 - \frac{6}{d} + \mathcal{O}\left(\frac{1}{d^2}\right) \\ \frac{\sigma_1}{c_d} & \rightarrow \frac{-6}{d+1} = -\frac{6}{d} + \mathcal{O}\left(\frac{1}{d^2}\right) \\ \frac{\sigma_2}{c_d} & \rightarrow \frac{6(d^2-2d+3)}{(d+1)(d-1)} = 6 - \frac{12}{d} + \mathcal{O}\left(\frac{1}{d^2}\right) \\ \frac{\sigma_3}{c_d} & \rightarrow \frac{-6(d-3)}{(d+1)(d-1)} = -\frac{6}{d} + \mathcal{O}\left(\frac{1}{d^2}\right). \end{cases} \quad (23)$$

*Proof.* The proof is straightforward from the definition of  $c_d$  and the  $\sigma$  coefficients, and Corollary 1.  $\square$

### 1.3 Concentration of $\hat{\Sigma}_n$

We now turn to the concentration of  $\hat{\Sigma}_n$  around  $\Sigma$ . More precisely, we show that  $\hat{\Sigma}_n$  is close to  $\Sigma$  in operator norm, with high probability. Since the definition of  $\hat{\Sigma}_n$  is identical to the one in the Tabular LIME case, we can use the proof machinery of Garreau and von Luxburg (2020b).

**Proposition 8 (Concentration of  $\hat{\Sigma}_n$ ).** *For any  $t \geq 0$ ,*

$$\mathbb{P}\left(\left\|\hat{\Sigma}_n - \Sigma\right\|_{\text{op}} \geq t\right) \leq 4d \cdot \exp\left(\frac{-nt^2}{32d^2}\right).$$

*Proof.* We can write  $\hat{\Sigma} = \frac{1}{n} \sum_i \pi_i Z_i Z_i^\top$ . The summands are bounded i.i.d. random variables, thus we can apply the matrix version of Hoeffding inequality. More precisely, the entries of  $\hat{\Sigma}_n$  belong to  $[0, 1]$  by construction, and Corollary 2 guarantees that the entries of  $\Sigma$  also belong to  $[0, 1]$ . Therefore, if we set  $M_i := \frac{1}{n} \pi_i Z_i Z_i^\top - \Sigma$ , then the  $M_i$  satisfy the assumptions of Theorem 21 in Garreau and von Luxburg (2020b) and we can conclude since  $\frac{1}{n} \sum_i M_i = \hat{\Sigma}_n - \Sigma$ .  $\square$

### 1.4 Control of $\|\Sigma^{-1}\|_{\text{op}}$

We now turn to the control of  $\|\Sigma^{-1}\|_{\text{op}}$ . Essentially, our strategy is to bound the entries of  $\Sigma^{-1}$ , and then to derive an upper bound for  $\|\Sigma^{-1}\|_{\text{op}}$  by noticing that  $\|\Sigma^{-1}\|_{\text{op}} \leq \|\Sigma^{-1}\|_{\text{F}}$ . Thus let us start by controlling the  $\sigma$  coefficients in absolute value.

**Lemma 1 (Control of the  $\sigma$  coefficients).** *Let  $d \geq 2$  and  $\nu \geq 1.66$ . Then it holds that*

$$|\sigma_0| \leq \frac{d}{3}, \quad |\sigma_1| \leq 1, \quad |\sigma_2| \leq \frac{3d}{2} e^{\frac{1}{2\nu^2}}, \quad \text{and} \quad |\sigma_3| \leq \frac{3}{2} e^{\frac{1}{2\nu^2}}.$$

*Proof.* By its definition, we know that  $\sigma_0$  is positive. Moreover, from Corollary 2, we see that

$$\begin{aligned} \sigma_0 &= (d-1)\alpha_2 + \alpha_1 \\ &\leq \frac{(d-1)(d-2)}{3d} + \frac{d-1}{2d} \\ &= \frac{2d^2 - 3d + 3}{6d}. \end{aligned}$$

One can check that for any  $d \geq 2$ , we have  $2d^2 - 3d + 3 \leq 2d^2$ , which concludes the proof of the first claim.

Since  $|\sigma_1| = \alpha_1$ , the second claim is straightforward from Corollary 2.

Regarding  $\sigma_2$ , we notice that

$$\sigma_2 = \frac{c_d + \alpha_1^2 - \alpha_0\alpha_2}{\alpha_1 - \alpha_2}.$$

Since  $\alpha_0 \geq \alpha_1 \geq \alpha_2$ , we have

$$-\alpha_1(\alpha_0 - \alpha_1) \leq \alpha_1^2 - \alpha_0\alpha_2 \leq \alpha_0(\alpha_1 - \alpha_2).$$

Using Eqs. (18) and (19) in conjunction with Corollary 2, we find that  $|\alpha_1^2 - \alpha_0\alpha_2| \leq 1/4$ . Moreover, from Eq. (20), we see that  $c_d \leq d/4$ . We deduce that

$$|\sigma_2| \leq \left(\frac{d}{4} + \frac{1}{4}\right) \cdot 6e^{\frac{1}{2\nu^2}},$$

where we used the first statement of Proposition 7 to lower bound  $\alpha_1\alpha_2$ . The results follows, since  $d \geq 2$ .

Finally, we write

$$\begin{aligned} |\sigma_3| &= \frac{|\alpha_1^2 - \alpha_0\alpha_2|}{\alpha_1 - \alpha_2} \\ &\leq \frac{1/4}{\frac{d+1}{6d} \cdot e^{\frac{-1}{2\nu^2}}} \end{aligned}$$

according to Proposition 7. □

We now proceed to bound the operator norm of  $\Sigma^{-1}$ .

**Proposition 9 (Control of  $\|\Sigma^{-1}\|_{\text{op}}$ ).** *For any  $d \geq 2$  and any  $\nu > 0$ , it holds that*

$$\|\Sigma^{-1}\|_{\text{op}} \leq 70d^{3/2}e^{\frac{5}{2\nu^2}}.$$

**Remark 2.** We notice that the control obtained worsens as  $d \rightarrow +\infty$  and  $\nu \rightarrow 0$ . We conjecture that the dependency in  $d$  is not tight. For instance, showing that  $c_d = \Omega(d)$  (that is, improving Proposition 7) would yield an upper bound of order  $d$  instead of  $d^{3/2}$ . The discussion after Proposition 7 indicates that such an improvement may be possible. Moreover, we see in experiments that the concentration of  $\hat{\beta}_n$  does not degrade that much for large  $d$  (see, in particular, Figure 17 in Section 6.2), another sign that Proposition 9 could be improved.

*Proof.* We will use the fact that  $\|\Sigma^{-1}\|_{\text{op}} \leq \|\Sigma^{-1}\|_{\text{F}}$ . We first write

$$\|\Sigma^{-1}\|_{\text{F}}^2 = \frac{1}{c_d^2} (\sigma_0^2 + 2d\sigma_1^2 + d\sigma_2^2 + (d^2 - d)\sigma_3^2),$$

by definition of the  $\sigma$  coefficients. On one hand, using Lemma 1, we write

$$\begin{aligned} \sigma_0^2 + 2d\sigma_1^2 + d\sigma_2^2 + (d^2 - d)\sigma_3^2 &\leq \frac{d^2}{9} + 2d + d \cdot (3d/2)^2 e^{\frac{1}{\nu^2}} + (d^2 - d) \cdot \frac{9}{4} e^{\frac{1}{\nu^2}} \\ &\leq 3d^3 e^{\frac{1}{\nu^2}}, \end{aligned} \tag{24}$$

where we used  $c_d \leq d$  and  $d \geq 2$  in the last display. On the other hand, a direct consequence of Proposition 7 is that

$$\frac{1}{c_d^2} \leq 1600e^{\frac{4}{\nu^2}}. \tag{25}$$

Putting together Eqs. (24) and (25), we obtain the claimed result, since  $\sqrt{3 \cdot 1600} \leq 70$ . □

## 2 The study of $\Gamma^f$

We now turn to the study of the (weighted) responses. In Section 2.1, we obtain an explicit expression for the average responses. We show how to obtain closed-form expressions in the case of indicator functions in Section 2.2. In the case of a linear model, we have to resort to approximations that are detailed in Section 2.3. Section 2.4 contains the concentration result for  $\hat{\Gamma}_n$ .

### 2.1 Computation of $\Gamma^f$

We start our study by giving an expression for  $\Gamma^f$  for any  $f$  under mild assumptions. Recall that we defined  $\hat{\Gamma}_n = \frac{1}{n} Z^\top W y$ , where  $y \in \mathbb{R}^{d+1}$  is the random vector defined coordinate-wise by  $y_i = f(x_i)$ . From the definition of  $\hat{\Gamma}_n$ , it is straightforward that

$$\hat{\Gamma}_n = \begin{pmatrix} \frac{1}{n} \sum_{i=1}^n \pi_i f(\phi(x_i)) \\ \frac{1}{n} \sum_{i=1}^n \pi_i z_{i,1} f(\phi(x_i)) \\ \vdots \\ \frac{1}{n} \sum_{i=1}^n \pi_i z_{i,d} f(\phi(x_i)) \end{pmatrix} \in \mathbb{R}^{d+1}.$$

As a consequence, since we defined  $\Gamma^f = \mathbb{E}[\hat{\Gamma}_n]$ , it holds that

$$\Gamma^f = \begin{pmatrix} \mathbb{E}[\pi f(\phi(x))] \\ \mathbb{E}[\pi z_1 f(\phi(x))] \\ \vdots \\ \mathbb{E}[\pi z_d f(\phi(x))] \end{pmatrix}. \quad (26)$$

Of course, Eq. (26) depends on the model  $f$ . These computations can be challenging. Nevertheless, it is possible to obtain exact results in simple situations.

**Constant model.** As a warm up, let us show how to compute  $\Gamma^f$  when  $f$  is constant. Perhaps the simplest model of all:  $f$  always returns the same value, whatever the value of  $\phi(x)$  may be. By linearity of  $\Gamma^f$  (see Section 3.2 of the main paper), it is sufficient to consider the case  $f = 1$ . From Eq. (26), we see that

$$\Gamma_j^f = \begin{cases} \mathbb{E}[\pi] & \text{if } j = 0, \\ \mathbb{E}[\pi z_j] & \text{otherwise.} \end{cases}$$

We recognize the definitions of the  $\alpha$  coefficients, and, more precisely,  $\Gamma_0^f = \alpha_0$  and  $\Gamma_j^f = \alpha_1$  if  $j \geq 1$ .

### 2.2 Indicator functions

Let us turn to a slightly more complicated class of models: indicator functions, or rather products of indicator functions. As explained in the paper, these functions fall into our framework. We have the following result:

**Proposition 10 (Computation of  $\Gamma^f$ , product of indicator functions).** *Set  $J \subseteq \{1, \dots, d\}$  a set of  $p$  distinct indices. Define*

$$f(\phi(x)) := \prod_{j \in J} \mathbf{1}_{\phi(x)_j > 0}.$$

*Then it holds that*

$$\Gamma_\ell^f = \begin{cases} \alpha_p & \text{if } \ell \in \{0\} \cup J \\ \alpha_{p+1} & \text{otherwise.} \end{cases}$$

*Proof.* As noticed in the paper,  $f$  can be written as a product of  $z_j$ s. Therefore, we only have to compute

$$\mathbb{E} \left[ \pi \prod_{j \in J} z_j \right] \quad \text{and} \quad \mathbb{E} \left[ \pi z_k \prod_{j \in J} z_j \right],$$

for any  $1 \leq k \leq d$ . The first term is  $\alpha_p$  by definition. For the second term, we notice that if  $\ell \in \{0\} \cup J$ , then two terms are identical in the product of binary features, and we recognize the definition of  $\alpha_p$ . In all other cases, there are no cancellation and we recover the definition of  $\alpha_{p+1}$ .  $\square$



### 2.3 Linear model

We now consider a linear model, that is,

$$f(\phi(x)) := \sum_{j=1}^d \lambda_j \phi(x)_j, \quad (27)$$

where  $\lambda_1, \dots, \lambda_d$  are arbitrary fixed coefficients. In order to simplify the computations, we will consider that  $\nu \rightarrow +\infty$  in this section. In that case,  $\pi \xrightarrow{\text{a.s.}} 1$ . It is clear that  $f$  is bounded on  $S^{D-1}$ , thus, by dominated convergence,

$$\Gamma^f \longrightarrow \Gamma_\infty := \begin{pmatrix} \mathbb{E}[f(\phi(x))] \\ \mathbb{E}[z_1 f(\phi(x))] \\ \vdots \\ \mathbb{E}[z_d f(\phi(x))] \end{pmatrix} \in \mathbb{R}^{d+1}. \quad (28)$$

By linearity of  $f \mapsto \Gamma_\infty^f$ , it is sufficient to compute  $\mathbb{E}[\phi(x)_j]$  and  $\mathbb{E}[z_k \phi(x)_j]$  for any  $1 \leq j, k \leq d$ .

For any  $1 \leq j \leq d$ , recall that we defined

$$\omega_k = \frac{m_j^2 v_j^2}{\sum_{k=1}^d m_k^2 v_k^2},$$

and  $H_S := \sum_{k \in S} \omega_k$ , where  $S$  is the random subset of indices chosen by LIME. The motivation for the definition of the random variable  $H_S$  is the following proposition: it is possible to write the expected TF-IDF as an expression depending on  $H_S$ .

**Proposition 11 (Expected normalized TF-IDF).** *Let  $w_j$  be a fixed word of  $\xi$ . Then, it holds that*

$$\mathbb{E}[\phi(x)_j] = \mathbb{E}[z_j \phi(x)_j] = \frac{d-1}{2d} \cdot \phi(\xi)_j \cdot \mathbb{E} \left[ \frac{1}{\sqrt{1-H_S}} \middle| S \not\ni j \right], \quad (29)$$

and, for any  $k \neq j$ ,

$$\mathbb{E}[z_k \phi(x)_j] = \frac{d-2}{3d} \cdot \phi(\xi)_j \cdot \mathbb{E} \left[ \frac{1}{\sqrt{1-H_S}} \middle| S \not\ni j, k \right]. \quad (30)$$

*Proof.* We start by proving Eq (29). Let us split the expectation depending on  $w_j \in x$ . Since the term frequency is 0 if  $w_j \notin x$ , we have

$$\mathbb{E}[\phi(x)_j] = \mathbb{E}[\phi(x)_j | w_j \in x] \mathbb{P}(w_j \in x). \quad (31)$$

Lemma 5 gives us the value of  $\mathbb{P}(w_j \in x)$ . Let us focus on the TF-IDF term in Eq. (31). By definition, it is the product of the term frequency and the inverse document frequency, normalized. Since the latter does not change when words are removed from  $\xi$ , only the norm changes: we have to remove all terms indexed by  $S$ . For any  $1 \leq j \leq d$ , let us set  $m_j$  (resp.  $v_j$ ) the term frequency (resp. the inverse term frequency) of  $w_j$ . Conditionally to  $\{w_j \in x\}$ ,

$$\phi(x)_j = \frac{m_j v_j}{\sqrt{\sum_{k \notin S} m_k^2 v_k^2}}.$$

Let us factor out  $\phi(\xi)_j$  in the previous display. By definition of  $H_S$ , we have

$$\phi(x)_j = \phi(\xi)_j \cdot \frac{1}{\sqrt{1 - \sum_{k \in S} \frac{m_k^2 v_k^2}{\|\varphi(\xi)\|^2}}} = \phi(\xi)_j \cdot \frac{1}{\sqrt{1 - H_S}}.$$

Since  $\{w_j \in x\}$  is equivalent to  $\{j \notin S\}$  by construction, we can conclude. The proof of the second statement is similar; one just has to condition with respect to  $\{w_j, w_k \in x\}$  instead, which is equivalent to  $\{S \not\ni j, k\}$ .  $\square$

As a direct consequence of Proposition 11, we can derive  $\Gamma_\infty^f = \lim_{\nu \rightarrow +\infty} \Gamma^f$  when  $f : x \mapsto x_j$ . Recall that we set  $E_j = \mathbb{E}[(1 - H_S)^{-1/2} | S \not\ni j]$  and  $E_{j,k} = \mathbb{E}[(1 - H_S)^{-1/2} | S \not\ni j, k]$ . Then

$$(\Gamma_\infty^f)_k = \begin{cases} \left(\frac{1}{2} - \frac{1}{2d}\right) \cdot E_j \cdot \phi(\xi)_j & \text{if } k = 0 \text{ or } k = j, \\ \left(\frac{1}{3} - \frac{2}{3d}\right) \cdot E_{j,k} \cdot \phi(\xi)_j & \text{otherwise.} \end{cases} \quad (32)$$

In practice, the expectation computations required to evaluate  $E_j$  and  $E_{j,k}$  are not tractable as soon as  $d$  is large. Indeed, in that case, the law of  $H_S$  is unknown and approximating the expectation by Monte-Carlo methods requires is hard since one has to sum over all subsets and there are  $\mathcal{O}(2^d)$  subsets  $S$  such that  $S \subseteq \{1, \dots, d\}$ . Therefore we resort to approximate expressions for these expected values computations.

We start by writing

$$\mathbb{E} \left[ \frac{1}{\sqrt{1-X}} \right] \approx \frac{1}{\sqrt{1-\mathbb{E}[X]}}. \quad (33)$$

All that is left to compute will be  $\mathbb{E}[H_S|S \not\ni j]$  and  $\mathbb{E}[H_S|S \not\ni j, k]$ . We see in Section 4 that after some combinatoric considerations, it is possible to obtain these expected values as a function of  $\omega_j$  and  $\omega_k$ . More precisely, Lemma 3 states that

$$\mathbb{E}[H_S|S \not\ni j] = \frac{1-\omega_j}{3} + \mathcal{O}\left(\frac{1}{d}\right) \quad \text{and} \quad \mathbb{E}[H_S|S \not\ni j, k] = \frac{1-\omega_j-\omega_k}{4} + \mathcal{O}\left(\frac{1}{d}\right). \quad (34)$$

When  $d$  is large and the  $\omega_k$ s are small, using Eq. (33), we obtain the following approximations:

$$\mathbb{E}[\phi(x)_j] \approx \frac{1}{2} \cdot \sqrt{\frac{1}{1-\frac{1}{3}}} \cdot \phi(\xi)_j \approx 0.61 \cdot \phi(\xi)_j, \quad (35)$$

and, for any  $k \neq j$ ,

$$\mathbb{E}[z_k \phi(x)_j] \approx \frac{1}{3} \cdot \sqrt{\frac{1}{1-\frac{1}{4}}} \cdot \phi(\xi)_j \approx 0.38 \cdot \phi(\xi)_j. \quad (36)$$

For all practical purposes, we will use Eq. (35) and (36).

**Remark 3.** One could obtain better approximations than above in two ways. First, it is possible to take into account the dependency in  $\omega_j$  and  $\omega_k$  in the expectation of  $H_S$ . That is, plugging Eq. (34) into Eq. (33) instead of the numerical values  $1/3$  and  $1/4$ . This yields more accurate, but more complicated formulas. Without being so precise, it is also possible to consider an arbitrary distribution for the  $\omega_k$ s (for instance, assuming that the term frequencies follow the Zipf's law (Powers, 1998)). Second, since the mapping  $\theta : x \mapsto \frac{1}{\sqrt{1-x}}$  is convex, by Jensen's inequality, we are always *underestimating* by considering  $\theta(\mathbb{E}[X])$  instead of  $\mathbb{E}[\theta(X)]$ . Going further in the Taylor expansion of  $\theta$  is a way to fix this problem, namely using

$$\mathbb{E} \left[ \frac{1}{\sqrt{1-X}} \right] \approx \frac{1}{\sqrt{1-\mathbb{E}[X]}} + \frac{3\text{Var}(X)}{8\sqrt{1-\mathbb{E}[X]}},$$

instead of Eq. (33). We found that **it was not useful to do so from an experimental point of view**: our theoretical predictions match the experimental results while remaining simple enough.

## 2.4 Concentration of $\hat{\Gamma}_n$

We now show that  $\hat{\Gamma}_n$  is concentrated around  $\Gamma^f$ . Since the expression of  $\hat{\Gamma}_n$  is the same than in the tabular case, and since  $f$  is bounded on the unit sphere  $S^{D-1}$ , the same reasoning as in the proof of Proposition 24 in Garreau and von Luxburg (2020b) can be applied.

**Proposition 12 (Concentration of  $\hat{\Gamma}_n$ ).** *Assume that  $f$  is bounded by  $M > 0$  on  $S^{D-1}$ . Then, for any  $t > 0$ , it holds that*

$$\mathbb{P} \left( \|\hat{\Gamma}_n - \Gamma^f\| \geq t \right) \leq 4d \exp \left( \frac{-nt^2}{32Md^2} \right).$$

*Proof.* Recall that  $\|\phi(x)\| = 1$  almost surely. Since  $f$  is bounded by  $M$  on  $S^{D-1}$ , it holds that  $|f(\phi(x))| \leq M$  almost surely. We can then proceed as in the proof of Proposition 24 in Garreau and von Luxburg (2020b).  $\square$

## 3 The study of $\beta^f$

In this section, we study the interpretable coefficients. We start with the computation of  $\beta^f$  in Section 3.1. In Section 3.2, we show how  $\hat{\beta}_n$  concentrates around  $\beta^f$ .

### 3.1 Computation of $\beta^f$

Recall that, for any model  $f$ , we have defined  $\beta^f = \Sigma^{-1}\Gamma^f$ . Directly multiplying the expressions found for  $\Sigma^{-1}$  (Eq. (17)) and  $\Gamma^f$  (Eq. (26)) obtained in the previous sections, we obtain the expression of  $\beta^f$  in the general case (this is Proposition 2 in the paper).

**Proposition 13 (Computation of  $\beta^f$ , general case).** *Assume that  $f$  is bounded on the unit sphere. Then*

$$\beta_0^f = c_d^{-1} \left\{ \sigma_0 \mathbb{E} [\pi f(\phi(x))] + \sigma_1 \sum_{k=1}^d \mathbb{E} [\pi z_k f(\phi(x))] \right\}, \quad (37)$$

and, for any  $1 \leq j \leq d$ ,

$$\beta_j^f = c_d^{-1} \left\{ \sigma_1 \mathbb{E} [\pi f(\phi(x))] + \sigma_2 \mathbb{E} [\pi z_j f(\phi(x))] + \sigma_3 \sum_{\substack{k=1 \\ k \neq j}}^d \mathbb{E} [\pi z_k f(\phi(x))] \right\}. \quad (38)$$

This is Proposition 2 in the paper, with the additional expression of the intercept  $\beta_0^f$ . Let us see how to obtain an approximate, simple expression when both the bandwidth parameter and the size of the local dictionary are large. When  $\nu \rightarrow +\infty$ , using Corollary 3, we find that

$$\beta_0^f \rightarrow (\beta_\infty^f)_0 := \frac{4d-2}{d+1} \mathbb{E} [\pi f(\phi(x))] - \frac{6}{d+1} \sum_{k=1}^d \mathbb{E} [\pi z_k f(\phi(x))],$$

and, for any  $1 \leq j \leq d$ ,

$$\beta_j^f \rightarrow (\beta_\infty^f)_j := \frac{-6}{d+1} \mathbb{E} [\pi f(\phi(x))] + \frac{6(d^2-2d+3)}{d^2-1} \mathbb{E} [\pi z_j f(\phi(x))] - \frac{6(d-3)}{d^2-1} \sum_{k \neq j} \mathbb{E} [\pi z_k f(\phi(x))].$$

For large  $d$ , since  $f$  is bounded on  $S^{D-1}$ , we find that

$$(\beta_\infty^f)_0 = 4\mathbb{E} [\pi f(\phi(x))] - \frac{6}{d} \sum_{k=1}^d \mathbb{E} [\pi z_k f(\phi(x))] + \mathcal{O}\left(\frac{1}{d}\right),$$

and, for any  $1 \leq j \leq d$ ,

$$(\beta_\infty^f)_j = 6\mathbb{E} [\pi z_j f(\phi(x))] - \frac{6}{d} \sum_{k \neq j} \mathbb{E} [\pi z_k f(\phi(x))] + \mathcal{O}\left(\frac{1}{d}\right).$$

Now, by definition of the interpretable features, for any  $1 \leq j \leq d$ ,

$$\begin{aligned} \mathbb{E} [\pi z_j f(\phi(x))] &= \mathbb{E} [\pi z_j f(\phi(x)) | w_j \in x] \cdot \mathbb{P}(w_j \in x) + \mathbb{E} [\pi z_j f(\phi(x)) | w_j \notin x] \cdot \mathbb{P}(w_j \notin x) \\ &= \mathbb{E} [\pi f(\phi(x)) | w_j \in x] \cdot \frac{d-1}{2d} + 0, \end{aligned}$$

where we used Lemma 5 in the last display. Therefore, we have the following approximations of the interpretable coefficients:

$$(\beta_\infty^f)_0 = 2\mathbb{E} [\pi f(\phi(x))] - \frac{3}{d} \sum_k \mathbb{E} [\pi f(\phi(x)) | w_k \in x] + \mathcal{O}\left(\frac{1}{d}\right), \quad (39)$$

and, for any  $1 \leq j \leq d$ ,

$$(\beta_\infty^f)_j = 3\mathbb{E} [\pi f(\phi(x)) | w_j \in x] - \frac{3}{d} \sum_k \mathbb{E} [\pi f(\phi(x)) | w_k \in x] + \mathcal{O}\left(\frac{1}{d}\right). \quad (40)$$

The last display is the approximation of Proposition 13 presented in the paper.

**Remark 4.** In Garreau and von Luxburg (2020b), it is noted that LIME for tabular data provably ignores unused coordinates. In other words, if the model  $f$  does not depend on coordinate  $j$ , then the explanation  $\beta_j^f$  is 0. We could not prove such a statement in the case of text data, even for simplified expressions such as Eq. (40).

We now show how to compute  $\beta^f$  in specific cases, thus returning to generic  $\nu$  and  $d$ .

**Constant model.** As a warm up exercise, let us assume that  $f$  is a constant, which we set to 1 without loss of generality (by linearity). Recall that, in that case,  $\Gamma_0^f = \alpha_0$  and  $\Gamma_j^f = \alpha_1$  for any  $1 \leq j \leq d$ . From the definition of  $c_d$  and the  $\sigma$  coefficients (Proposition 6), we find that

$$\begin{cases} \sigma_0 \alpha_0 + d \sigma_1 \alpha_1 & = c_d, \\ \sigma_1 \alpha_0 + \sigma_2 \alpha_1 + (d-1) \sigma_3 \alpha_1 & = 0. \end{cases}$$

We deduce from Proposition 13 that  $\beta_0^f = 1$  and  $\beta_j^f = 0$  for any  $1 \leq j \leq d$ . This is conform to our intuition: if the model is constant, then no word should receive nonzero weight in the explanation provided by Text LIME.

**Indicator functions.** We now turn to indicator functions, more precisely *products* of indicator functions. We will prove the following (Proposition 3 in the paper):

**Proposition 14 (Computation of  $\beta^f$ , product of indicator functions).** *Let  $j \subseteq \{1, \dots, d\}$  be a set of  $p$  distinct indices and set  $f(x) = \prod_{j \in J} \mathbf{1}_{x_j > 0}$ . Then*

$$\begin{cases} \beta_0^f & = c_d^{-1} (\sigma_0 \alpha_p + p \sigma_1 \alpha_p + (d-p) \sigma_1 \alpha_{p+1}), \\ \beta_j^f & = c_d^{-1} (\sigma_1 \alpha_p + \sigma_2 \alpha_p + (d-p) \sigma_3 \alpha_{p+1} + (p-1) \sigma_3 \alpha_p) \text{ if } j \in J, \\ \beta_j^f & = c_d^{-1} (\sigma_1 \alpha_p + \sigma_2 \alpha_{p+1} + (d-p-1) \sigma_3 \alpha_{p+1} + p \sigma_3 \alpha_p) \text{ otherwise.} \end{cases}$$

*Proof.* The proof is straightforward from Proposition 10 and Proposition 13.  $\square$

**Linear model.** In this last paragraph, we treat the linear case. As noted in Section 2.3, we have to resort to approximate computations: in this paragraph, we assume that  $\nu = +\infty$ . We start with the simplest linear function: all coefficients are zero except one (this is Proposition 4 in the paper).

**Proposition 15 (Computation of  $\beta^f$ , linear case).** *Let  $1 \leq j \leq d$  and assume that  $f(\phi(x)) = \phi(x)_j$ . Recall that we set  $E_j = \mathbb{E}[(1 - H_S)^{-1/2} | S \not\ni j]$  and for any  $k \neq j$ ,  $E_{j,k} = \mathbb{E}[(1 - H_S)^{-1/2} | S \not\ni j, k]$ . Then*

$$(\beta_\infty^f)_0 = \left\{ 5E_j - \frac{2}{d} \sum_{k \neq j} E_{j,k} \right\} \phi(\xi)_j + \mathcal{O}\left(\frac{1}{d}\right)$$

for any  $k \neq j$ ,

$$(\beta_\infty^f)_k = \left\{ 2E_{j,1} - \frac{2}{d} \sum_{\ell \neq k, j} E_{j,\ell} \right\} \phi(\xi)_j + \mathcal{O}\left(\frac{1}{d}\right),$$

and

$$(\beta_\infty^f)_j = \left\{ 3E_j - \frac{2}{d} \sum_{k \neq j} E_{j,k} \right\} \phi(\xi)_j + \mathcal{O}\left(\frac{1}{d}\right).$$

*Proof.* Straightforward from Eqs. (23) and (32).  $\square$

Assuming that the  $\omega_k$  are small, we deduce from Eqs. (35) and (36) that  $E_j \approx 1.22$  and  $E_{j,k} \approx 1.15$ . In particular, they do not depend on  $j$  and  $k$ . Thus we can drastically simplify the statement of Proposition 15:

$$\forall k \neq j, \quad (\beta_\infty^f)_k \approx 0 \quad \text{and} \quad (\beta_\infty^f)_j \approx 1.36 \phi(\xi)_j. \quad (41)$$

We can now go back to our original goal:  $f(x) = \sum_{j=1}^d \lambda_j x_j$ . By linearity, we deduce from Eq. (41) that

$$\forall 1 \leq j \leq d, \quad (\beta_\infty^f)_j \approx 1.36 \cdot \lambda_j \cdot \phi(\xi)_j. \quad (42)$$

In other words, as noted in the paper, **the explanation for a linear  $f$  is the TF-IDF of the word multiplied by the coefficient of the linear model**, up to a numerical constant and small error terms depending on  $d$ .

### 3.2 Concentration of $\hat{\beta}$

In this section, we state and prove our main result: the concentration of  $\hat{\beta}_n$  around  $\beta^f$  with high probability (this is Theorem 1 in the paper).

**Theorem 2 (Concentration of  $\hat{\beta}_n$ ).** *Suppose that  $f$  is bounded by  $M > 0$  on  $S^{D-1}$ . Let  $\epsilon > 0$  be a small constant, at least smaller than  $M$ . Let  $\eta \in (0, 1)$ . Then, for every*

$$n \geq \max \left\{ 2^9 \cdot 70^4 M^2 d^9 e^{\frac{10}{\nu^2}}, 2^9 \cdot 70^2 M d^5 e^{\frac{5}{\nu^2}} \right\} \frac{\log \frac{8d}{\eta}}{\epsilon^2},$$

we have  $\mathbb{P} \left( \|\hat{\beta}_n - \beta^f\| \geq \epsilon \right) \leq \eta$ .

*Proof.* We follow the proof scheme of Theorem 28 in Garreau and von Luxburg (2020b). The key point is to notice that

$$\|\hat{\beta}_n - \beta^f\| \leq 2 \|\Sigma^{-1}\|_{\text{op}} \|\hat{\Gamma}_n - \Gamma^f\| + 2 \|\Sigma^{-1}\|_{\text{op}}^2 \|\Gamma^f\| \|\hat{\Sigma}_n - \Sigma\|_{\text{op}}, \quad (43)$$

provided that  $\|\Sigma^{-1}(\hat{\Sigma}_n - \Sigma)\|_{\text{op}} \leq 0.32$  (this is Lemma 27 in Garreau and von Luxburg (2020b)). Therefore, in order to show that  $\|\hat{\beta}_n - \beta^f\| \leq \epsilon$ , it suffices to show that each term in Eq. (43) is smaller than  $\epsilon/4$  and that  $\|\Sigma^{-1}(\hat{\Sigma} - \Sigma)\|_{\text{op}} \leq 0.32$ . The concentration results obtained in Section 1 and 2 guarantee that both  $\|\hat{\Sigma} - \Sigma\|_{\text{op}}$  and  $\|\hat{\Gamma} - \Gamma^f\|$  are small if  $n$  is large enough, with high probability. This, combined with the upper bound on  $\|\Sigma^{-1}\|_{\text{op}}$  given by Proposition 9, concludes the proof.

Let us give a bit more details. We start with the control of  $\|\Sigma^{-1}(\hat{\Sigma}_n - \Sigma)\|_{\text{op}}$ . Set  $t_1 := (220d^{3/2}e^{\frac{5}{2\nu^2}})^{-1}$  and  $n_1 := 32d^2 \log \frac{8d}{\eta}/t_1^2$ . Then, according to Proposition 8, for any  $n \geq n_1$ ,

$$\mathbb{P} \left( \|\hat{\Sigma}_n - \Sigma\|_{\text{op}} \geq t_1 \right) \leq 4d \exp \left( \frac{-nt_1^2}{32d^2} \right) \leq \frac{\eta}{2}.$$

Since  $\|\Sigma^{-1}\|_{\text{op}} \leq 70d^{3/2}e^{\frac{5}{2\nu^2}}$  (according to Proposition 9), by sub-multiplicativity of the operator norm, it holds that

$$\|\Sigma^{-1}(\hat{\Sigma} - \Sigma)\|_{\text{op}} \leq \|\Sigma^{-1}\|_{\text{op}} \|\hat{\Sigma} - \Sigma\|_{\text{op}} \leq 70/220 < 0.32, \quad (44)$$

with probability greater than  $1 - \eta/2$ .

Now let us set  $t_2 := (4 \cdot 70^2 M d^{7/2} e^{\frac{5}{\nu^2}})^{-1} \epsilon$  and  $n_2 := 32d^2 \log \frac{8d}{\eta}/t_2^2$ . According to Proposition 8, for any  $n \geq n_2$ , it holds that

$$\|\hat{\Sigma}_n - \Sigma\|_{\text{op}} \leq \frac{\epsilon}{4M d^{1/2}} \cdot (70^2 d^3 e^{5/\nu^2})^{-1},$$

with probability greater than  $\eta/2$ . Since  $\|\Gamma^f\| \leq M \cdot d^{1/2}$  and  $\|\Sigma^{-1}\|_{\text{op}}^2 \leq 70^2 d^3 e^{5/\nu^2}$ ,

$$\|\Sigma^{-1}\|_{\text{op}} \|\hat{\Gamma} - \Gamma^f\| \leq \frac{\epsilon}{4}$$

with probability greater than  $1 - \eta/2$ . Notice that, since we assumed  $\epsilon < M$ ,  $t_2 < t_1$ , and thus Eq. (44) also holds.

Finally, let us set  $t_3 := \epsilon/(4 \cdot 70d^{3/2}e^{\frac{5}{2\nu^2}})$  and  $n_3 := 32M d^2 \log \frac{8d}{\eta}/t_3^2$ . According to Proposition 12, for any  $n \geq n_3$ ,

$$\mathbb{P} \left( \|\hat{\Gamma}_n - \Gamma^f\| \geq t_3 \right) \leq 4d \exp \left( \frac{-nt_3^2}{32M d^2} \right) \leq \frac{\eta}{2}.$$

Since  $\|\Sigma^{-1}\|_{\text{op}} \leq 70d^{3/2}e^{\frac{5}{2\nu^2}}$ , we deduce that

$$\|\Sigma^{-1}\|_{\text{op}}^2 \|\Gamma^f\| \|\hat{\Sigma}_n - \Sigma\|_{\text{op}} \leq \frac{\epsilon}{2},$$

with probability greater than  $1 - \eta/2$ . We conclude by a union bound argument.  $\square$

## 4 Sums over subsets

In this section, independent from the rest, we collect technical facts about sums over subsets. More particularly, we now consider arbitrary, fixed positive real numbers  $\omega_1, \dots, \omega_d$  such that  $\sum_k \omega_k = 1$ . We are interested in subsets  $S$  of  $\{1, \dots, d\}$ . For any such  $S$ , we define  $H_S := \sum_{k \in S} \omega_k$  the sum of the  $\omega_k$  coefficients over  $S$ . Our main goal in this section is to compute the expectation of  $H_S$  conditionally to  $S$  not containing a given index (or two given indices), which is the key quantity appearing in Proposition 15.

**Lemma 2 (First order subset sums).** *Let  $1 \leq s \leq d$  and  $1 \leq j, k \leq d$  with  $j \neq k$ . Then*

$$\sum_{\substack{\#S=s \\ S \not\ni j}} H_S = \binom{d-2}{s-1} (1 - \omega_j),$$

and

$$\sum_{\substack{\#S=s \\ S \not\ni j, k}} H_S = \binom{d-3}{s-1} (1 - \omega_j - \omega_k).$$

*Proof.* The main idea of the proof is to rearrange the sum, summing over all indices and then counting how many subsets satisfy the condition. That is,

$$\begin{aligned} \sum_{\substack{\#S=s \\ S \ni j}} H_S &= \sum_{k=1}^d \omega_k \cdot \#\{S \text{ s.t. } j, k \in S\} \\ &= \sum_{k \neq j} \omega_k \cdot \binom{d-2}{s-2} + \omega_j \cdot \binom{d-1}{s-1} \\ &= \binom{d-2}{s-2} + \left[ \binom{d-1}{s-1} - \binom{d-2}{s-2} \right] \omega_j. \end{aligned}$$

We conclude by using the binomial identity

$$\binom{d-1}{s-1} - \binom{d-2}{s-2} = \binom{d-2}{s-1}.$$

Notice that, in the previous derivation, we had to split the sum to account for the case  $j = k$ . The proof of the second formula is similar.  $\square$

Let us turn to expectation computation that are important to derive approximation in Section 2.3. We now see  $S$  and  $H_S$  as random variables. We will denote by  $\mathbb{E}_s[\cdot]$  the expectation conditionally to the event  $\{\#S = s\}$ .

**Lemma 3 (Expectation computation).** *Let  $j, k$  be distinct elements of  $\{1, \dots, d\}$ . Then*

$$\mathbb{E}[H_S | S \not\ni j] = \frac{(1 - \omega_j)(d+1)}{3(d-1)} = \frac{1 - \omega_j}{3} + \mathcal{O}\left(\frac{1}{d}\right), \quad (45)$$

and

$$\mathbb{E}[H_S | S \not\ni j, k] = \frac{(1 - \omega_j - \omega_k)(d+1)}{4(d-2)} = \frac{1 - \omega_j - \omega_k}{4} + \mathcal{O}\left(\frac{1}{d}\right) \quad (46)$$

*Proof.* By the law of total expectation, we know that

$$\mathbb{E}[H_S | S \not\ni j] = \sum_{s=1}^d \mathbb{E}_s[H_S | S \not\ni j] \cdot \mathbb{P}(\#S = s | S \not\ni j).$$

We first notice that, for any  $s < d$ ,

$$\begin{aligned}\mathbb{P}(\#S = s | S \not\ni j) &= \frac{\mathbb{P}(S \not\ni j | \#S = s) \mathbb{P}(\#S = s)}{\mathbb{P}(j \notin S)} \\ &= \frac{\binom{d-1}{s} / \binom{d}{s} \cdot \frac{1}{d}}{\frac{d-1}{2d}} \\ \mathbb{P}(\#S = s | S \not\ni j) &= \frac{2(d-s)}{d(d-1)}.\end{aligned}$$

According to Lemma 2, for any  $1 \leq s < d$ ,

$$\sum_{\substack{\#S=s \\ S \not\ni j}} H_S = \binom{d-2}{s-1} (1 - \omega_j).$$

Moreover, there are  $\binom{d-1}{s}$  such subsets. Since  $\binom{d-1}{s-1} \binom{d-2}{s} = \frac{s}{d-1}$ , we deduce that

$$\mathbb{E}_s[H_S | S \not\ni j] = \frac{s}{d-1} (1 - \omega_j).$$

Finally, we write

$$\begin{aligned}\mathbb{E}[H_S | S \not\ni j] &= \sum_{s=1}^{d-1} \frac{s}{d-1} (1 - \omega_j) \cdot \frac{2(d-s)}{d(d-1)} \\ &= (1 - \omega_j) \cdot \frac{2}{d(d-1)^2} \sum_{s=1}^{d-1} s(d-s) \\ \mathbb{E}[H_S | S \not\ni j] &= \frac{(d+1)(1 - \omega_j)}{3(d-1)}.\end{aligned}$$

The second case is similar. One just has to note that

$$\begin{aligned}\mathbb{P}(\#S = s | S \not\ni j, k) &= \frac{\mathbb{P}(S \not\ni j, k | \#S = s)}{\mathbb{P}(j, k \notin S)} \\ &= \frac{3(d-s)(d-s-1)}{d(d-1)(d-2)}.\end{aligned}\tag{Lemma 5}$$

Then we can conclude since

$$\sum_{s=1}^{d-2} s(d-s)(d-s-1) = \frac{(d-2)(d-1)d(d+1)}{12}.$$

□

## 5 Technical results

In this section, we collect small probability computations that are ubiquitous in our derivations. We start with the probability for a given word to be present in the new sample  $x$ , conditionally to  $\#S = s$ .

**Lemma 4 (Conditional probability to contain given words).** *Let  $w_1, \dots, w_p$  be  $p$  distinct words of  $D_\ell$ . Then, for any  $1 \leq s \leq d$ ,*

$$\mathbb{P}_s(w_1 \in x, \dots, w_p \in x) = \frac{(d-s)(d-s-1) \cdots (d-s-p+1)}{d(d-1) \cdots (d-p+1)} = \frac{(d-s)!}{(d-s-p)!} \cdot \frac{(d-p)!}{d!}.$$

In the proofs, we use extensively Lemma 4 for  $p = 1$  and  $p = 2$ , that is,

$$\mathbb{P}_s(w_j \in x) = \frac{d-s}{d} \quad \text{and} \quad \mathbb{P}_s(w_j \in x, w_k \in x) = \frac{(d-s)(d-s-1)}{d(d-1)},$$

for any  $1 \leq j, k \leq d$  with  $j \neq k$ .

*Proof.* We prove the more general statement. Conditionally to  $\#S = s$ , the choice of  $S$  is uniform among all subsets of  $\{1, \dots, d\}$  of cardinality  $s$ . There are  $\binom{d}{s}$  such subsets, and only  $\binom{d-p}{s}$  of them do not contain the indices corresponding to  $w_1, \dots, w_p$ .  $\square$

We have the following result, without conditioning on the cardinality of  $S$ :

**Lemma 5 (Probability to contain given words).** *Let  $w_1, \dots, w_p$  be  $p$  distinct words of  $D_\ell$ . Then*

$$\mathbb{P}(w_1, \dots, w_p \in x) = \frac{d-p}{(p+1)d}.$$

*Proof.* By the law of total expectation,

$$\begin{aligned} \mathbb{P}(w_1, \dots, w_p \in x) &= \frac{1}{d} \sum_{s=1}^d \mathbb{P}(w_1, \dots, w_p \in x | s) \\ &= \frac{1}{d} \sum_{s=1}^d \frac{(d-s)!}{(d-s-p)!} \cdot \frac{(d-p)!}{d!}, \end{aligned}$$

where we used Lemma 4 in the last display. By the hockey-stick identity (Ross, 1997), we have

$$\sum_{s=1}^d \binom{d-s}{p} = \sum_{s=p}^{d-1} \binom{s}{p} = \binom{d}{p+1}.$$

We deduce that

$$\sum_{s=1}^d \frac{(d-s)!}{(d-s-p)!} = \frac{d!}{(p+1) \cdot (d-p-1)!}. \quad (47)$$

We deduce that

$$\begin{aligned} \mathbb{P}(w_1, \dots, w_p \in x) &= \frac{1}{d} \frac{(d-p)!}{d!} \sum_{s=1}^d \frac{(d-s)!}{(d-s-p)!} \\ &= \frac{1}{d} \frac{(d-p)!}{d!} \frac{d!}{(p+1) \cdot (d-p-1)!} \quad (\text{by Eq. (47)}) \\ \mathbb{P}(w_1, \dots, w_p \in x) &= \frac{d-p}{(p+1)d}. \end{aligned}$$

$\square$

## 6 Additional experiments

In this section, we present additional experiments. We collect the experiments related to decision trees in Section 6.1 and those related to linear models in Section 6.2.

**Setting.** All the experiments presented here and in the paper are done on Yelp reviews (the data are publicly available at <https://www.kaggle.com/omkarsabnis/yelp-reviews-dataset>). For a given model  $f$ , the general mechanism of our experiments is the following. For a given document  $\xi$  containing  $d$  distinct words, we set a bandwidth parameter  $\nu$  and a number of new samples  $n$ . Then we run LIME  $n_{\text{exp}}$  times on  $\xi$ , with no feature selection procedure (that is, all words belonging to the local dictionary receive an explanation). We want to emphasize again that this is the only difference with the default implementation. Unless otherwise specified, the parameters of LIME are chosen by default, that is,  $\nu = 0.25$  and  $n = 5000$ . The number of experiments  $n_{\text{exp}}$  is set to 100. The whisker boxes are obtained by collecting the empirical values of the  $n_{\text{exp}}$  runs of LIME: they give an indication as to the variability in explanations due to the sampling of new examples. Generally, we report a subset of the interpretable coefficients, the other having near zero values.

Let us explain briefly how to read these whisker boxes: to each word corresponds a whisker box containing all the  $n_{\text{exp}}$  values of interpretable coefficients provided by LIME ( $\hat{\beta}_j$  in our notation). The horizontal dark lines



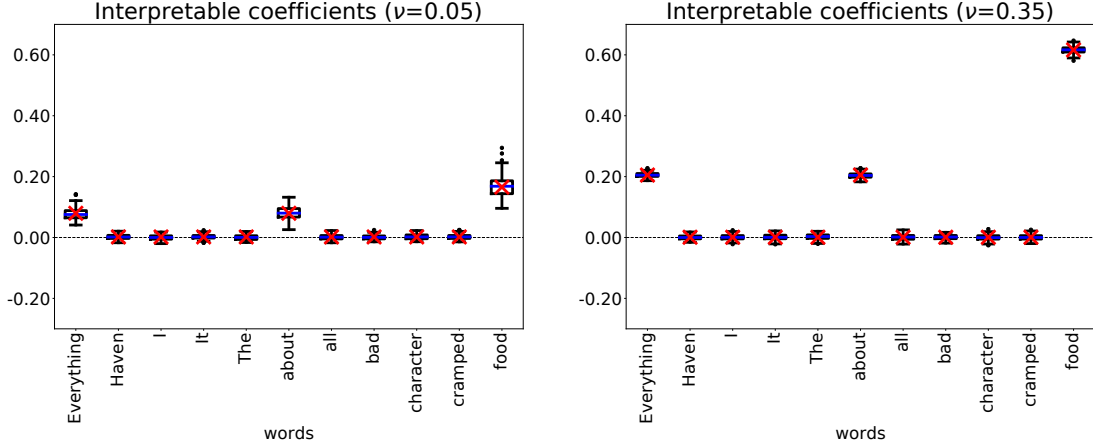

Figure 12: Influence of the bandwidth on the explanation given for a small decision tree on a Yelp review ( $n = 5000$ ,  $n_{\text{exp}} = 100$ ,  $d = 29$ ). *Left panel:*  $\nu = 0.05$ , *right panel:*  $\nu = 0.35$ . Our theoretical predictions remain accurate for non-default bandwidths.

mark the quartiles of these values, and the horizontal blue line is the median. On top of these experimental results, we report with red crosses the values predicted by our analysis ( $\beta_j^f$  in our notation).

The Python code for all experiments is available at [https://github.com/dmardaoui/lime\\_text\\_theory](https://github.com/dmardaoui/lime_text_theory). We encourage the reader to try and run the experiments on other examples of the dataset and with other parameters.

## 6.1 Decision trees

In this section, we present additional experiments for small decision trees. We begin by investigating the influence of  $\nu$  and  $n$  on the quality of our theoretical predictions.

**Influence of the bandwidth.** Let us consider the same example  $\xi$  and decision tree as in the paper. In particular, the model  $f$  is written as

$$\mathbf{1}_{\text{"food"}} + (1 - \mathbf{1}_{\text{"food"}}) \cdot \mathbf{1}_{\text{"about"}} \cdot \mathbf{1}_{\text{"Everything"}} .$$

We now consider non-default bandwidths, that is, bandwidths different than 0.25. We present in Figure 12 the results of these experiments. In the left panel, we took a smaller bandwidth ( $\nu = 0.05$ ) and in the right panel a larger bandwidth ( $\nu = 0.35$ ). We see that while the numerical value of the coefficients changes slightly, their relative order is preserved. Moreover, our theoretical predictions remain accurate in that case, which is to be expected since we did not resort to any approximation in this case. Interestingly, the empirical results for small  $\nu$  seem more spread out, as hinted by Theorem 2.

**Influence of the number of samples.** Keeping the same model and example to explain as above, we looked into non-default number of samples  $n$ . We present in Figure 13 the results of these experiments. We took a very small  $n$  in the left panel ( $n = 50$  is two orders of magnitude smaller than the default  $n = 5000$ ) and a larger  $n$  in the right panel. As expected, when  $n$  is larger, the concentration around our theoretical predictions is even better. To the opposite, for small  $n$ , we see that the explanations vary wildly. This is materialized by much wider whisker boxes. Nevertheless, to our surprise, it seems that our theoretical predictions still contain some relevant information in that case.

**Influence of depth.** Finally, we looked into more complex decision trees. The decision rule used in Figure 14 is given by

$$\mathbf{1}_{\text{"food"}} + (1 - \mathbf{1}_{\text{"food"}}) \mathbf{1}_{\text{"about"}} \mathbf{1}_{\text{"Everything"}} + \mathbf{1}_{\text{"bad"}} + \mathbf{1}_{\text{"bad"}} \mathbf{1}_{\text{"character"}} .$$

We see that increasing the depth of the tree is not a problem from a theoretical point of view. It is interesting to see that words used in several nodes for the decision receive more weight (*e.g.*, “bad” in this example).

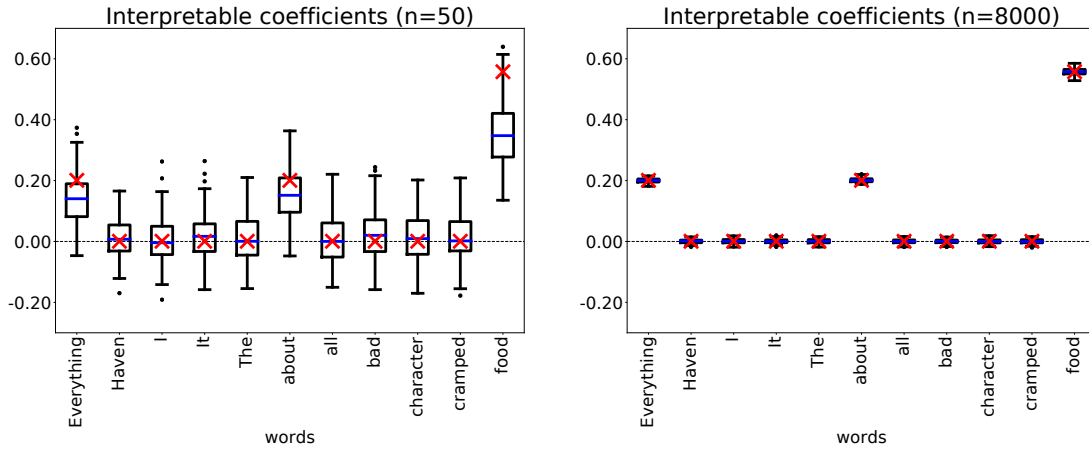

Figure 13: Influence of the number of perturbed samples on the explanation given for a small decision tree on a Yelp review ( $\nu = 0.25, n_{\text{exp}} = 100, d = 29$ ). *Left panel:*  $n = 50$ , *right panel:*  $n = 8000$ . Empirical values are less likely to be close to the theoretical predictions for small  $n$ .

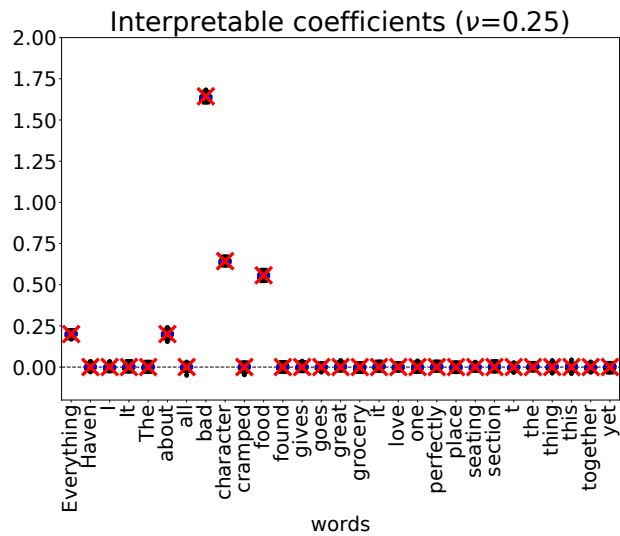

Figure 14: Theory meets practice for a more complex decision tree ( $\nu = 0.25, n_{\text{exp}} = 100, n = 5000, d = 29$ ). Here we report all coefficients. The theory still holds for more complex trees.

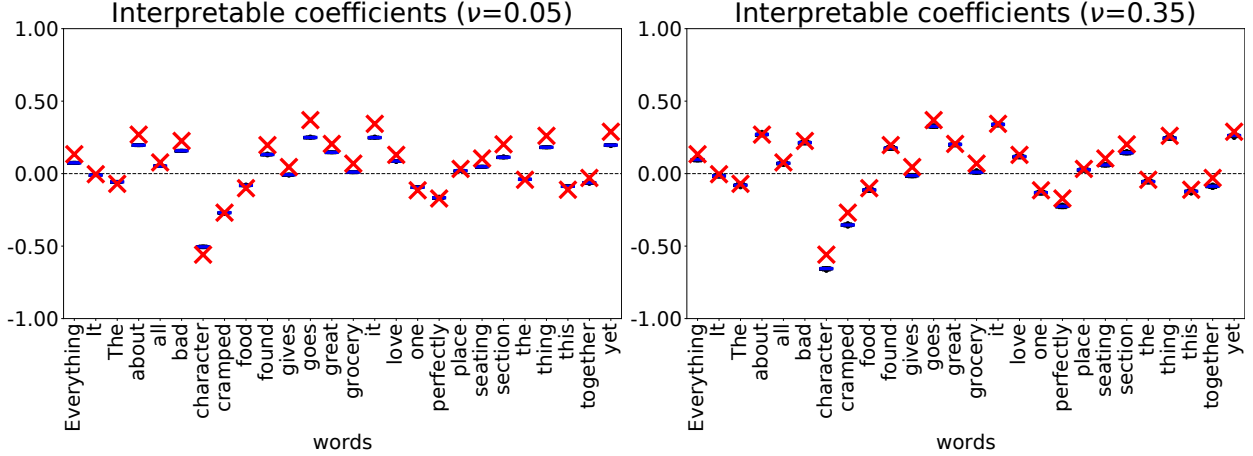

Figure 15: Influence of the bandwidth on the explanation for a linear model on a Yelp review ( $n_{\text{exp}} = 100, n = 5000, d = 29$ ). *Left panel:*  $\nu = 0.05$ , *right panel:*  $\nu = 0.35$ . The approximate theoretical values are less accurate for smaller bandwidths.

## 6.2 Linear models

Let us conclude this section with additional experiments for linear models. As in the paper, we consider an arbitrary linear model

$$f(\phi(x)) = \sum_{j=1}^d \lambda_j \phi(x)_j.$$

In practice, the coefficients  $\lambda_j$  are drawn i.i.d. according to a Gaussian distribution.

**Influence of the bandwidth.** As in the previous section, we start by investigating the role of the bandwidth in the accuracy of our theoretical predictions. We see in the right panel of Figure 15 that taking a larger bandwidth does not change much neither the explanations nor the fit between our theoretical predictions and the empirical results. This is expected, since our approximation (Eq. (42)) is based on the large bandwidth approximation. However, the left panel of Figure 15 shows how this approximation becomes dubious when the bandwidth is small. It is interesting to note that in that case, the theory seems to always *overestimate* the empirical results, in absolute value. The large bandwidth approximation is definitely a culprit here, but it could also be the regularization coming into play. Indeed, the discussion at the end of Section 2.4 in the paper that lead us to ignore the regularization is no longer valid for a small  $\nu$ . In that case, the  $\pi_i$ s can be quite small and the first term in Eq. (5) of the paper is of order  $e^{-1/(2\nu^2)}n$  instead of  $n$ .

**Influence of the number of samples.** Now let us look at the influence of the number of perturbed samples. As in the previous section, we look into very small values of  $n$ , *e.g.*,  $n = 50$ . We see in the left panel of Figure 16 that, as expected, the variability of the explanations increases drastically. The theoretical predictions seem to overestimate the empirical results in absolute value, which could again be due to the regularization beginning to play a role for small  $n$ , since the discussion in Section 2.4 of the paper is only valid for large  $n$ .

**Influence of  $d$ .** To conclude this section, let us note that  $d$  does not seem to be a limiting factor in our analysis. While Theorem 2 hints that the concentration phenomenon may worsen for large  $d$ , as noted before in Remark 2, we have reason to suspect that it is not the case. All experiments presented on this section so far consider an example whose local dictionary has size  $d = 29$ . In Figure 17 we present an experiment on an example that has a local dictionary of size  $d = 52$ . We observed no visible change in the accuracy of our predictions.

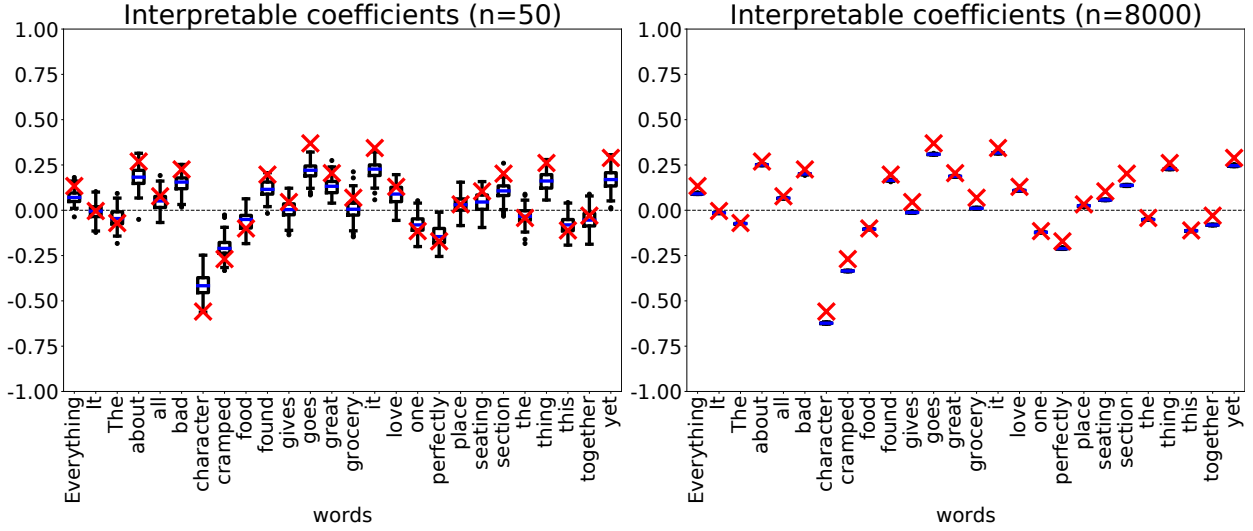

Figure 16: Influence of the number of perturbed samples on the explanation for a linear model on a Yelp review ( $\nu = 0.25, n_{\text{exp}} = 100, d = 29$ ). *Left panel:*  $n = 50$ , *right panel:*  $n = 8000$ . The empirical explanations are more spread out for small values of  $n$ .

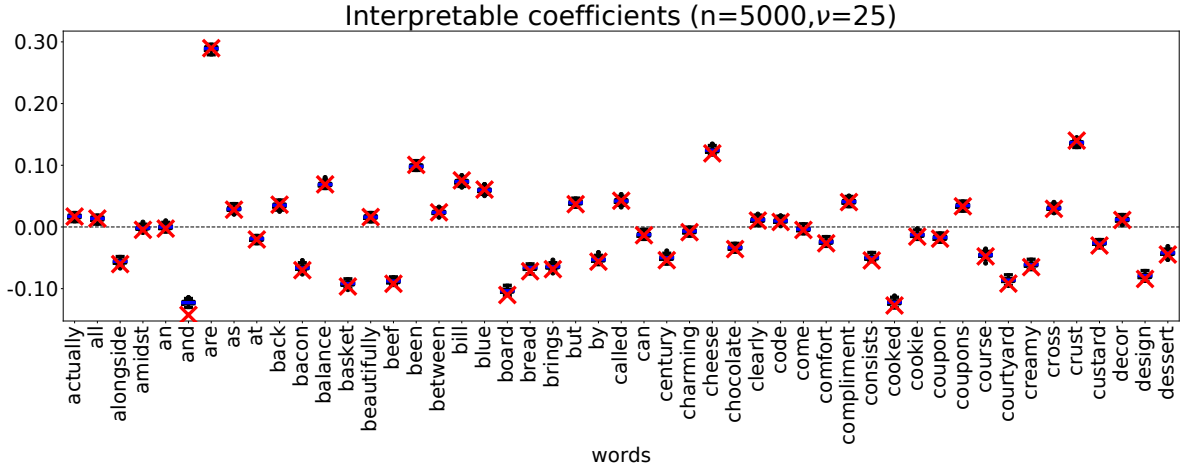

Figure 17: Theory meets practice for an example with a larger vocabulary ( $\nu = 0.25, n_{\text{exp}} = 100, n = 5000, d = 537$ ). Here we report only 50 interpretable coefficients. Our theoretical predictions seem to hold for larger local dictionaries.
